# Supplementary material for: Mathematics, Thermodynamics, and Modeling to Address Ten Common Misconceptions about Protein Structure, Folding, and Stability
Source: Atypon-hosted journal article supplement (doi:10.1187/cbe.10-03-0018), 2010-09-01
Supplement: supplemental_material.pdf [file supplemental_material.pdf]

| <b>Experimental thermodynamic data</b> | <b>E. coli RNase H</b> | <b>T. thermophilus RNase H</b> |
|----------------------------------------|------------------------|--------------------------------|
| $\Delta H$ (cal/mol)                   | 120000                 | 131000                         |
| $T_m$ ( $^{\circ}\text{C}$ )           | 66                     | 86                             |
| $\Delta C_p$                           | 2700                   | 1.8                            |

### **1. A Thermodynamic Comparison of Mesophilic and Thermophilic Ribonucleases H†**

Julie Hollien and, Susan Marqusee  
*Biochemistry* **1999** 38 (12), 3831-3836

Thermodynamic values for other proteins c

<http://gibk26.bse.kyutech.ac.jp/jouhou/protherm/protherm.html>

can be found at:
